# Supplementary material for: Regulation of the cohesin-loading factor NIPBL: Role of the lncRNA NIPBL-AS1 and identification of a distal enhancer element
Source: PubMed Central journal article supplement (PMC5754091; doi:10.1371/journal.pgen.1007137), 2017-12-20

FIGURE S1

A Cellular localization of the NIPBL-AS1 noncoding RNA

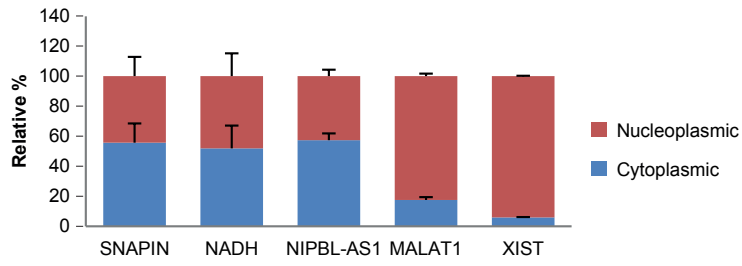

NIPBL-AS1 and NIPBL mRNA levels after ASO knockdown in HB2 cells:

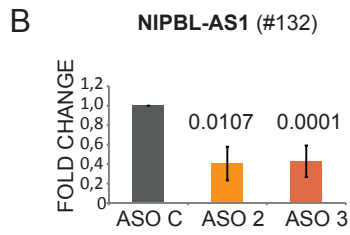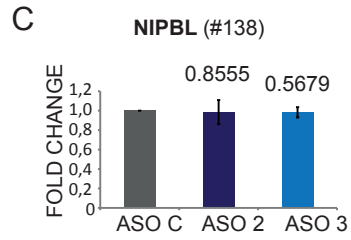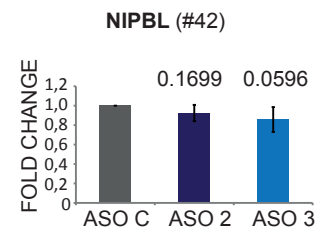

Supplement: pgen.1007137.s001.pdf [file pgen.1007137.s001.pdf]
