# Supplementary material for: Regulation of the cohesin-loading factor NIPBL: Role of the lncRNA NIPBL-AS1 and identification of a distal enhancer element
Source: PubMed Central journal article supplement (PMC5754091; doi:10.1371/journal.pgen.1007137), 2017-12-20

FIGURE S6:

NIPBL-AS1 and NIPBL mRNA levels in the clones deleted for R1\_1 (D1) and both R1\_1 and R1\_2 (D2)

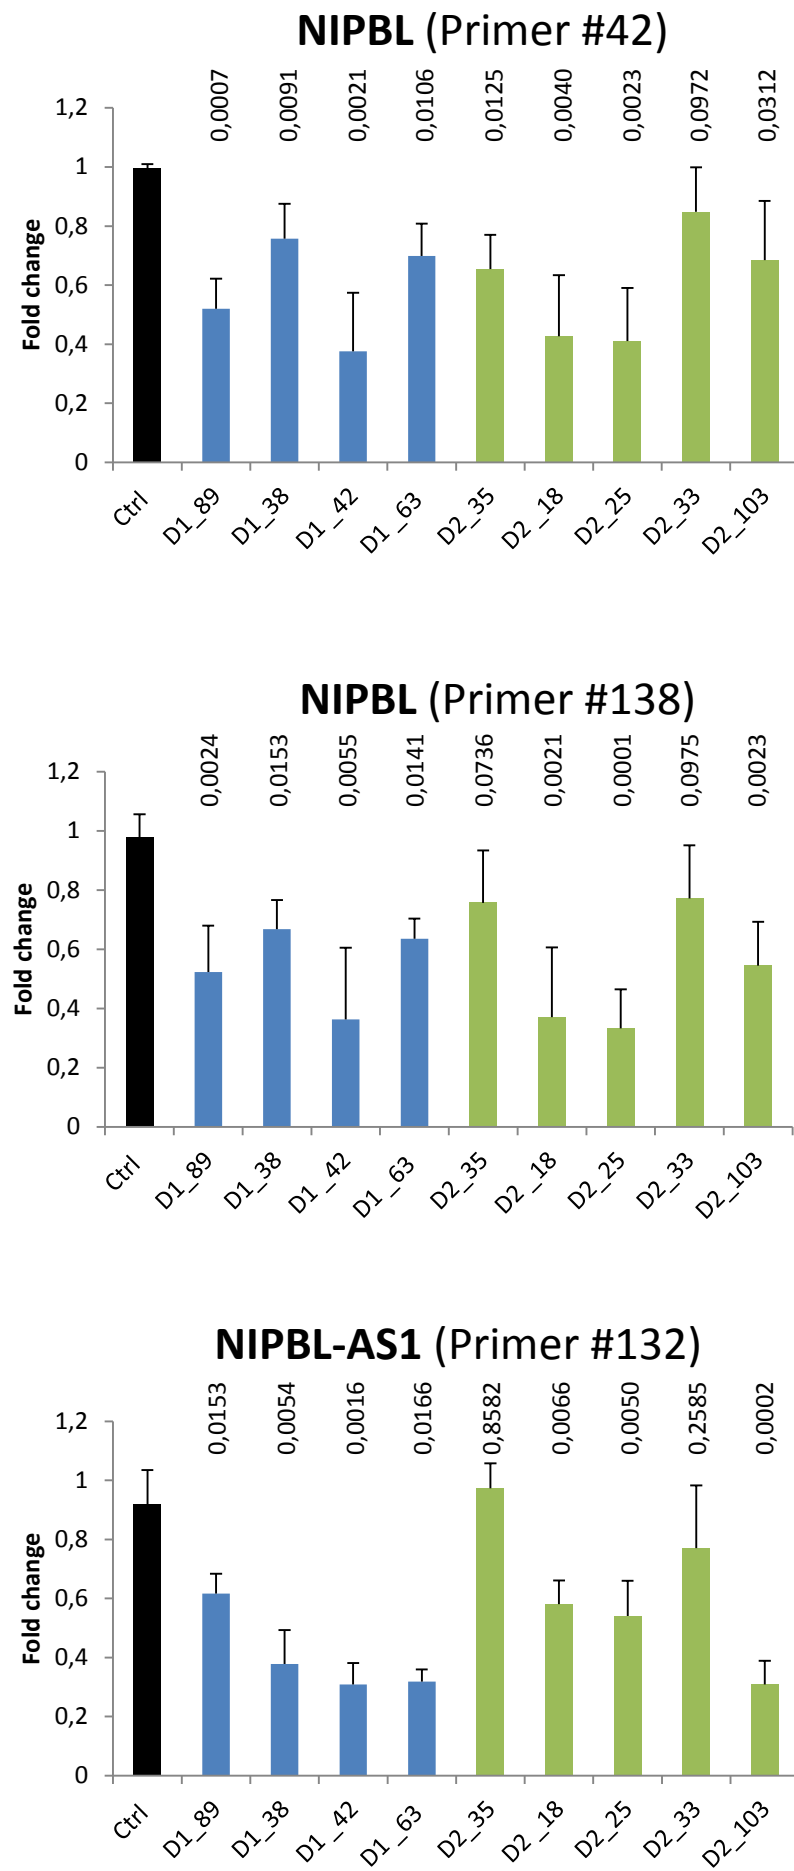

Supplement: pgen.1007137.s006.pdf [file pgen.1007137.s006.pdf]
