# Supplementary material for: Regulation of the cohesin-loading factor NIPBL: Role of the lncRNA NIPBL-AS1 and identification of a distal enhancer element
Source: PubMed Central journal article supplement (PMC5754091; doi:10.1371/journal.pgen.1007137), 2017-12-20

A

|    |           | Gender | Age |
|----|-----------|--------|-----|
| C1 | 27574-B   | M      | 3,5 |
| C2 | 95-3985-S | F      | 7   |
| C3 | 95-3999-B | M      | 8   |
| C4 | GIA-001-S | F      | 6,8 |

|     |         | Gender | Age | Mutation                     |
|-----|---------|--------|-----|------------------------------|
| PT1 | 132-01P | F      | 9   | c.4606C>T/ Nonsense          |
| PT2 | 173-04P | M      | 6,9 | c.6407_6408 insA/ Frameshift |
| PT3 | 285-05P | M      | 0   | c.2449_2450insG/ Frameshift  |

C

Pyrosequencing of mRNA from CdLs LCLs:

| Treatment             | DMSO   |        | Cycloheximide |        |        |
|-----------------------|--------|--------|---------------|--------|--------|
|                       | Allele | WT     | MUTANT        | WT     | MUTANT |
| PT1 (c.4606C.T)       |        | C: 62% | T: 38%        | C: 52% | T: 48% |
| PT3 (c.2449 2450insG) |        | C: 76% | T: 24%        | C: 54% | T: 46% |

NIPBL-AS1 and NIPBL mRNA levels in control and patient LCLs:

B

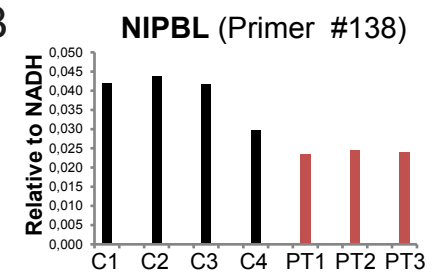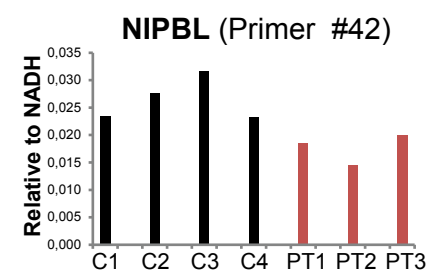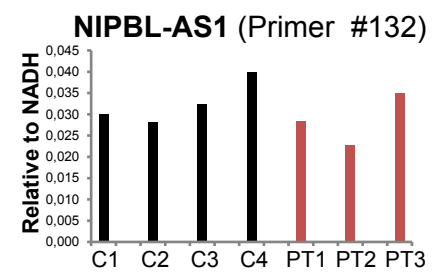

Supplement: pgen.1007137.s008.pdf [file pgen.1007137.s008.pdf]
