# Supplementary material for: Regulation of the cohesin-loading factor NIPBL: Role of the lncRNA NIPBL-AS1 and identification of a distal enhancer element
Source: PubMed Central journal article supplement (PMC5754091; doi:10.1371/journal.pgen.1007137), 2017-12-20
Supplement: pgen.1007137.s009.pdf [file pgen.1007137.s009.pdf]

S2 Table

Guide RNA used in the different experiments

| Experiment                                                                             | gRNA Name | Target Region         | Position (hg19)        |
|----------------------------------------------------------------------------------------|-----------|-----------------------|------------------------|
| Control gRNA                                                                           | GC_F      | gAAAGACATCTGCCTTGACAG | chr5:36759180-36759199 |
|                                                                                        | GC_R      | CTGTCAAGGCAGATGTCTTc  |                        |
| gRNAs for blocking NIPBL-AS1 transcription                                             | G1_F      | gATAGAGAACGGTGAACAA   | chr5:36875822-36875844 |
|                                                                                        | G1_R      | TTGTTCCACCGTTCTCTATc  |                        |
|                                                                                        | G2_F      | gTCCAGGAAAATAAAGACAG  | chr5:36876573-36876595 |
|                                                                                        | G2_R      | CTGTCTTTATTTTCCTGGAc  |                        |
| gRNAs for blocking NIPBL transcription (designed on minus strand-->target plus strand) | G3_F      | gGACGCTGAGGACCTGGCGC  | chr5:36877325-36877344 |
|                                                                                        | G3_R      | GCGCCAGGTCTCAGCGTc    |                        |
|                                                                                        | G4_F      | gGTGGCGAGAGACTATAATC  | chr5:36877218-36877237 |
|                                                                                        | G4_R      | GATTATAGTCTCTCGCCAc   |                        |
|                                                                                        | G5_F      | gGTGAGTCGGTACCGACGGA  | chr5:36876949-36876968 |
|                                                                                        | G5_R      | TCCGTCGGTACCGACTCACc  |                        |
| gRNAs for blocking NIPBL transcription (designed on plus strand-->target minus strand) | G6_F      | gCGACAGGAGAATTGGTTCC  | chr5:36877003-36877022 |
|                                                                                        | G6_R      | GGAACCAATTCTCCTGTCGc  |                        |
|                                                                                        | G7_F      | AACGATTTGTCTTCTCGGC   | chr5:36877120-36877139 |
|                                                                                        | G7_R      | GCCGAGAAGACAAATCGTTc  |                        |
| gRNAs for R1 region deletion                                                           | gRNA1_F   | gAGGCAGCCAGGCAGTTTCT  | chr5:36737782-36737804 |
|                                                                                        | gRNA1_R   | GAAACTGCCTGGCTGCCTc   |                        |
|                                                                                        | gRNA2_F   | gGCTGCGGATACACCTTGCA  | chr5:36743873-36743895 |
|                                                                                        | gRNA2_R   | TGCAAGGTGTATCCGCAGCc  |                        |
|                                                                                        | gRNA3_F   | gTTCCTTCTACGCTCACTGA  | chr5:36748879-36748901 |
|                                                                                        | gRNA3_R   | TCAGTGAGCGTAGAAGGAAc  |                        |
