# Supplementary material for: Regulation of the cohesin-loading factor NIPBL: Role of the lncRNA NIPBL-AS1 and identification of a distal enhancer element
Source: PubMed Central journal article supplement (PMC5754091; doi:10.1371/journal.pgen.1007137), 2017-12-20
Supplement: pgen.1007137.s010.pdf [file pgen.1007137.s010.pdf]

**S2 Table****Primer used to detect the deletions generated by CRISPR/Cas9**

| <b>Primer to detect deletions in R1</b> | <b>Target region</b>                             | <b>Position (hg19)</b> |
|-----------------------------------------|--------------------------------------------------|------------------------|
| P2_F<br>P2_R                            | TGTGGCTTGGCCTAATTG<br>CAGAGGCTGGTTCTCTTG         | chr5:36743828-36749685 |
| P3_F<br>P3_R                            | AACGCGAGCCTTCTCTTCC<br>TGGTTCTCTTGGTCCAGGAGG     | chr5:36737654-36749678 |
| P4_F<br>P4_R                            | CCCAACACCTGTTCCCTCTTAC<br>CCTGGGACTGACATTTCTGTTC | chr5:36737678-36737840 |
| P5_F<br>P5_R                            | CTCAAGGGCAGACACAATG<br>GGCACTTACTCTGTGAAAGG      | chr5:36742317-36742621 |
| P6_F<br>P6_R                            | GCCCAAATAGCACTGCAGAC<br>GAAAGTGGCAGAGCTGTGAG     | chr5:36743671-36744015 |
| P7_F<br>P7_R                            | GGTACATGGCTCCCATTTGAAC<br>AGTGCCTAGGTAAGGAACCTTG | chr5:36746584-36746885 |
| P8_F<br>P8_R                            | ACTACATGCCAGGCACAATC<br>TGGCATTCTGGCCTAACTC      | chr5:36748530-36748959 |
