# Supplementary material for: Regulation of the cohesin-loading factor NIPBL: Role of the lncRNA NIPBL-AS1 and identification of a distal enhancer element
Source: PubMed Central journal article supplement (PMC5754091; doi:10.1371/journal.pgen.1007137), 2017-12-20
Supplement: pgen.1007137.s011.pdf [file pgen.1007137.s011.pdf]

**S3 Table****3C-seq viewpoint primer pairs**

| <b>Viewpoint</b> | <b>Primer Name</b>  | <b>Sequence</b>                                 | <b>Position</b>        |
|------------------|---------------------|-------------------------------------------------|------------------------|
| VP1              | BgIII_F<br>NlaIII_R | ATTAGATTAACAGATTCTATGTAAG<br>CCTCCTTGCTTCAAGAAC | chr5:36873783-36873807 |
| VP2              | BgIII_F<br>NlaIII_R | TTTGGTCAAACGTTGAG<br>ATGGAAACTTTTTGAGATGTA      | chr5:36944718-36944738 |
| VP3              | BgIII_F<br>NlaIII_R | CTCGTATCTGCTTCATATGG<br>CTCAAACCTGGACTTAAATTC   | chr5:36973150-36973170 |
| VP4              | ApoI_F<br>NlaIII_R  | CGCCGATTCGCCAGGTA<br>TCTCCGTCTCCTCAGTGCG        | chr5:36877168-36877283 |
| VP5              | NlaIII_F<br>ApoI_R  | GAGCACTGACTTGGTCTTC<br>CAGTGGATGGGAATGAAT       | chr5:36739739-36740347 |
| VP6              | NlaIII_F<br>ApoI_R  | ACGTGGCAGGCTTCAT<br>CAGATCCGTTTGCCTGGAAT        | chr5:36725938-36726330 |
