# Supplementary material for: Regulation of the cohesin-loading factor NIPBL: Role of the lncRNA NIPBL-AS1 and identification of a distal enhancer element
Source: PubMed Central journal article supplement (PMC5754091; doi:10.1371/journal.pgen.1007137), 2017-12-20
Supplement: pgen.1007137.s012.pdf [file pgen.1007137.s012.pdf]

## S4 Table

### Primer used for qPCR analysis of transcripts

| Primer Nr.       | orientation | Sequence                    |
|------------------|-------------|-----------------------------|
| 132*             | forward     | TTTCCTAGTGGACCTACATTTG      |
|                  | reverse     | CCCATGTTTATTATTGTGCTGTATC   |
| 138*             | forward     | GTCGCAGCAAGAACAAAC          |
|                  | reverse     | GCCTCCTGTGGTAAGAATC         |
| 42*              | forward     | GGAGTGACATGGCTAATTCC        |
|                  | reverse     | TCATCAGGGTCCAGATGTTC        |
| TC25             | forward     | AGCGGAGTTTGTATAGGG          |
|                  | reverse     | GTTTGGCTGTCTTCTCTG          |
| TC30             | forward     | AGGCGAACCTCCTCTTTGG         |
|                  | reverse     | GACGCAGAACGCTGATGTG         |
| TC34             | forward     | GGAATCCTGCTGCATCAC          |
|                  | reverse     | TCGTCCTCCTCTTCTTCC          |
| NADH             | forward     | ACTGGCTACTGCGTACATCC        |
|                  | reverse     | AGATGCGCCTATCTCTTTCC        |
| SNAPIN           | forward     | AGCTCGACTCTCACGTACAC        |
|                  | reverse     | GCCGGGCATTAAGTAGCTTC        |
| NIPBL<br>nascent | forward     | GTCGCAGCAAGAACAAAC          |
|                  | reverse     | GATGAAGTGGAATAATGAGA        |
| MALAT1           | forward     | GATAATCAGACCACAGGTTTACAG    |
|                  | reverse     | AAAGAGTAACTACCAGCCATTTCTCCA |
| XIST             | forward     | ACATGCCTGGCACTCTAGCA        |
|                  | reverse     | AAACATGGAAATGGGTAAGACACA    |

\*The positions of these primers is indicated in Figure 1A.

### Primer used for CHIP-qPCR analysis

| Primer Nr. | orientation | Sequence               |
|------------|-------------|------------------------|
| AS1        | forward     | AGCGCCTAATAAGTCCTC     |
|            | reverse     | CAGCTGCTACAGTCAATC     |
| AS2        | forward     | CCTGACCTCAGCTTTCATTG   |
|            | reverse     | GTACCAGGCACGCTAATTC    |
| AS3        | forward     | GAATTCGTCCCGTTGAG      |
|            | reverse     | CTGGACAAGGCTGGAATAC    |
| AS4        | forward     | GCCTTTATCCTGACCGTTAG   |
|            | reverse     | TCGGCTGGATTGAATTGG     |
| AS5        | forward     | GCTCACGACCACCACCGAACTC |
|            | reverse     | CTCAGGGCGGCTGTGGATGTTG |
| S1         | forward     | CGTGGTCGGGTGTTTGTGAGTG |
|            | reverse     | ACTATAATCCGGGCCGGGAG   |
| S2         | forward     | GCCTCCCCTTGGATTCAGAC   |
|            | reverse     | CACCAGAGAGGAGCGAACTC   |

The positions of all primers is indicated in Figure S2A.
